# Supplementary material for: De Novo Transcriptome Sequence Assembly from Coconut Leaves and Seeds with a Focus on Factors Involved in RNA-Directed DNA Methylation
Source: PubMed Central journal article supplement (PMC4232540; doi:10.1534/g3.114.013409), 2014-09-04
Supplement: supp_g3.114.013409_013409SI.pdf [file supp_g3.114.013409_013409SI.pdf]

De novo transcriptome sequence assembly from coconut leaves and seeds with a focus on factors involved in RNA-directed DNA methylation

Ya-Yi Huang\*, Chueh-Pai Lee §, Jason L. Fu\*, Bill Chia-Han Chang§, Antonius J.M. Matzke\* and Marjori Matzke\*

\*Institute of Plant and Microbial Biology, Academia Sinica, Taipei, Taiwan

§Yourgene Bioscience, Taipei, Taiwan

Corresponding authors: Marjori Matzke and Antonius J.M. Matzke, Institute of Plant and Microbial Biology, Academia Sinica, 128, Sec. 2, Academia Road, Nangang, Taipei 11529, Taiwan. Email: [marjorimatzke@gate.sinica.edu.tw](mailto:marjorimatzke@gate.sinica.edu.tw), [antoniusmatzke@gate.sinica.edu.tw](mailto:antoniusmatzke@gate.sinica.edu.tw)

DOI: 10.1534/g3.114.013409

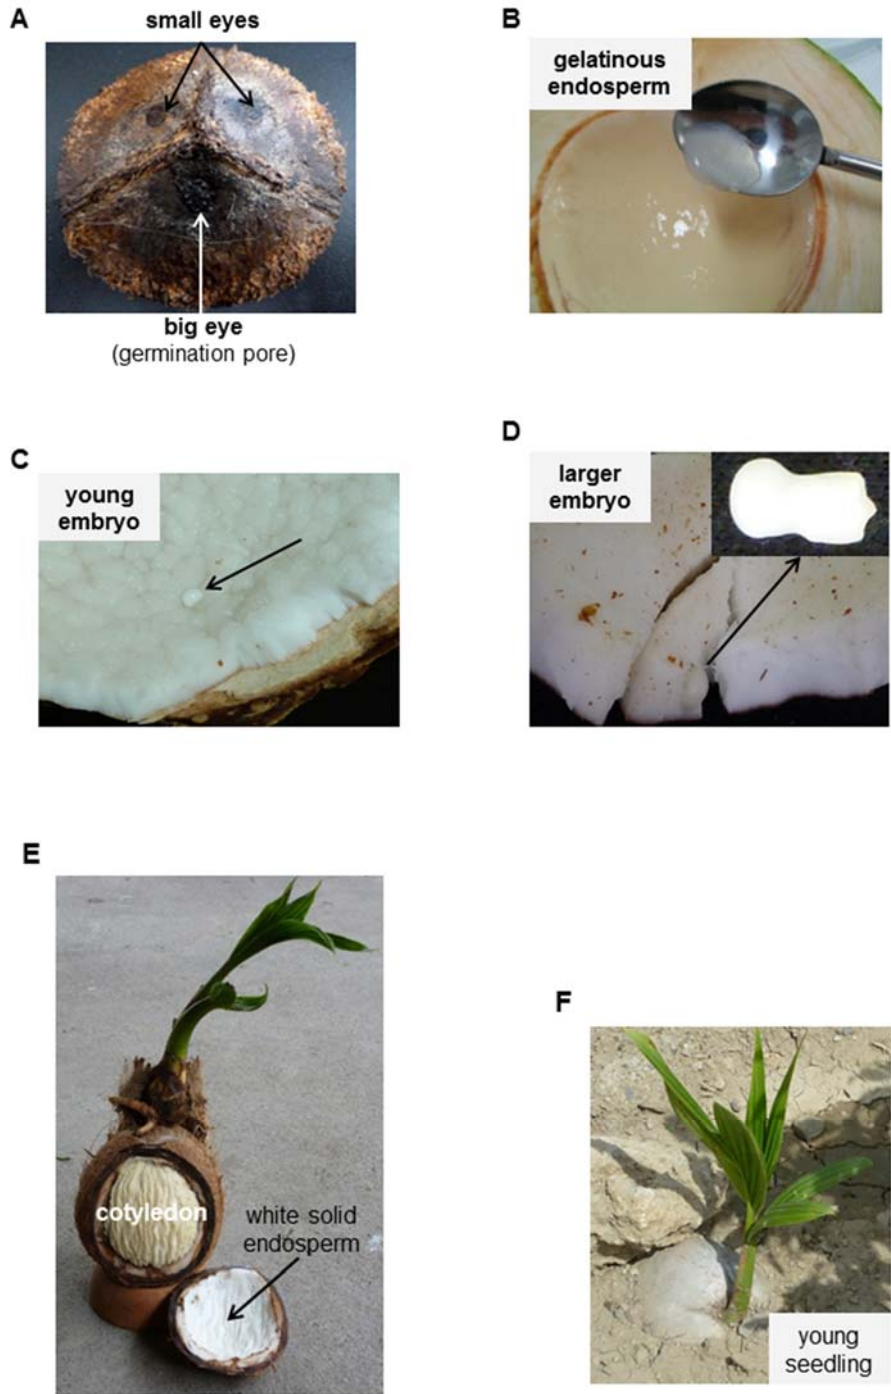

**Figure S1** – Coconut seed development. The seeds of flowering plants (angiosperms) contain the products of double fertilization: a diploid embryo containing one maternal (m) and one paternal (p) genome and a triploid endosperm (2m:1p). The embryo grows into the adult plant while the endosperm represents a terminally differentiated tissue that provides nutrients for the developing embryo. In monocots such as coconut, the embryo is very small compared to the endosperm. Coconut has the second largest seed in the world, only after the *Lodoicea maldivica*, another palm species endemic to the Seychelles.

Coconut fruit is a drupe in which exocarp and mesocarp make up the husk while the endocarp forms a

protective hard shell with three uneven germination pores (the eyes). The three eyes (one large, two small) are visible on the outside surface of the shell after the husk is removed (Part A). The mature embryo (around 100 mg) can be found right below the largest eye (soft eye). It is also where the sprout emerges through the husk. Coconut seeds at a very young stage have a cavity within contains abundant aqueous endosperm (coconut water). The liquid endosperm contains free-floating nuclei resulting from a primary nucleus that goes through a process of division without cytokinesis. As the seed development continues, the nuclei move to the periphery and cellularization occurs (Cutter et al., 1952), turning the liquid endosperm first into translucent jelly (Part B) and eventually into up to ten grams of white solid flesh. The solid white flesh only forms a layer on the inner surface of the cavity and never fills it completely.

The embryo, invisible when the endosperm is in liquid form, begins to develop right below the soft eye as the endosperm solidifies. Surrounded by endosperm, the young embryo (ca. 6-month-old) becomes visible at the beginning of endosperm solidification (Part C). As the layer of solid endosperm thickens, the growing embryo is embedded completely in white solid flesh and can only be seen after the flesh is torn apart (Part D). Germination begins when the embryo grows a plumule outwards and a single cotyledon inwards. The plumule eventually pierces through the soft eye and the husk and further develops shoot upwards and root system downwards. The cotyledon absorbs nutrients from both liquid and solid endosperm to support the growth of the plumule. Its tissue becomes spongy and eventually fills up the cavity of the seed (Part E).

Cutter, V.M., Wilson, K.S. and Dube, G.R. 1952. The isolation of living nuclei from the endosperm of *Cocos nucifera*. Science, 115, 58-59.

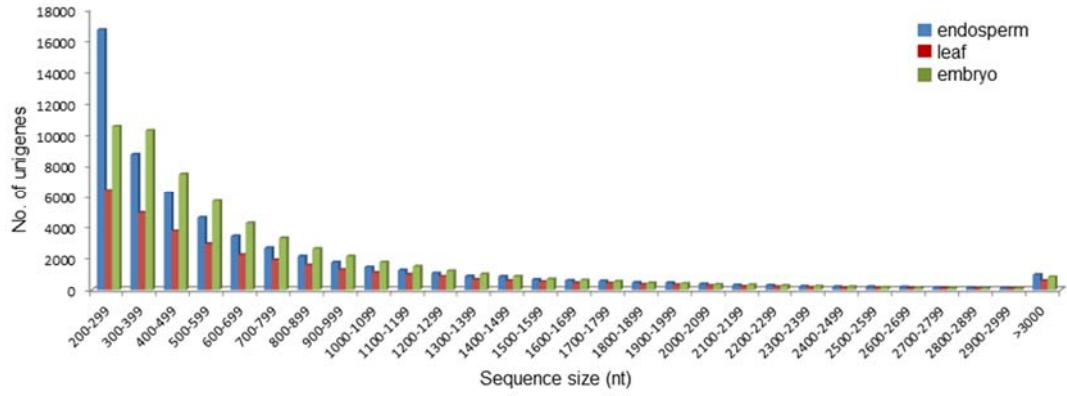

**Figure S2** – Length distribution of total unigenes found in three coconut tissues.

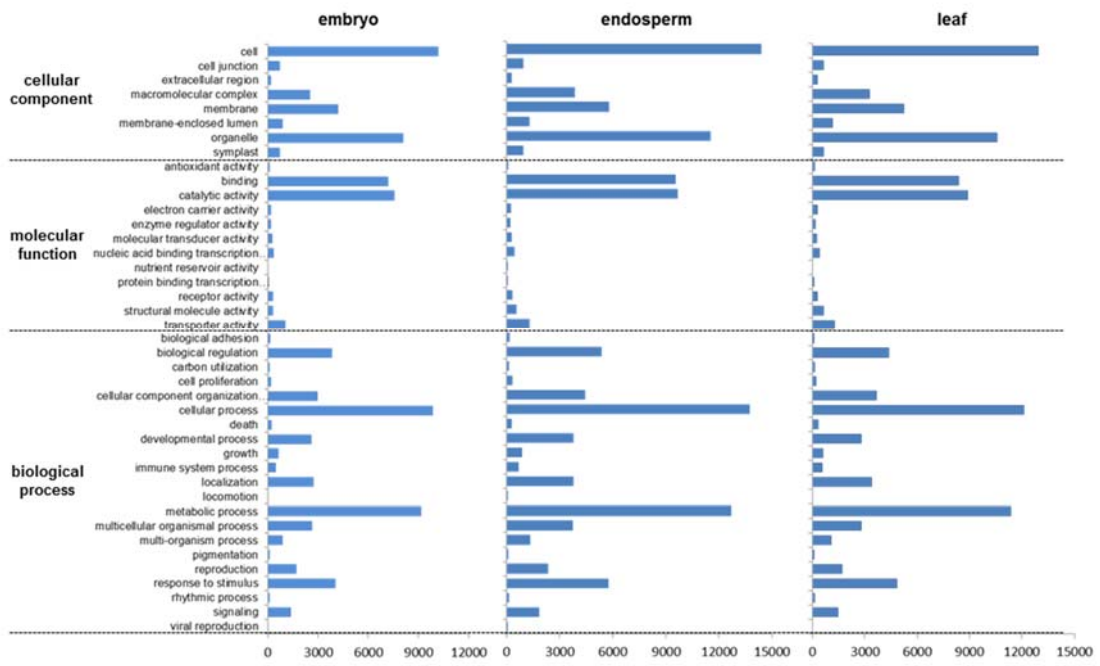

Figure S3. Analysis of gene ontology at level two.

### GO annotation at level 8: Cellular component

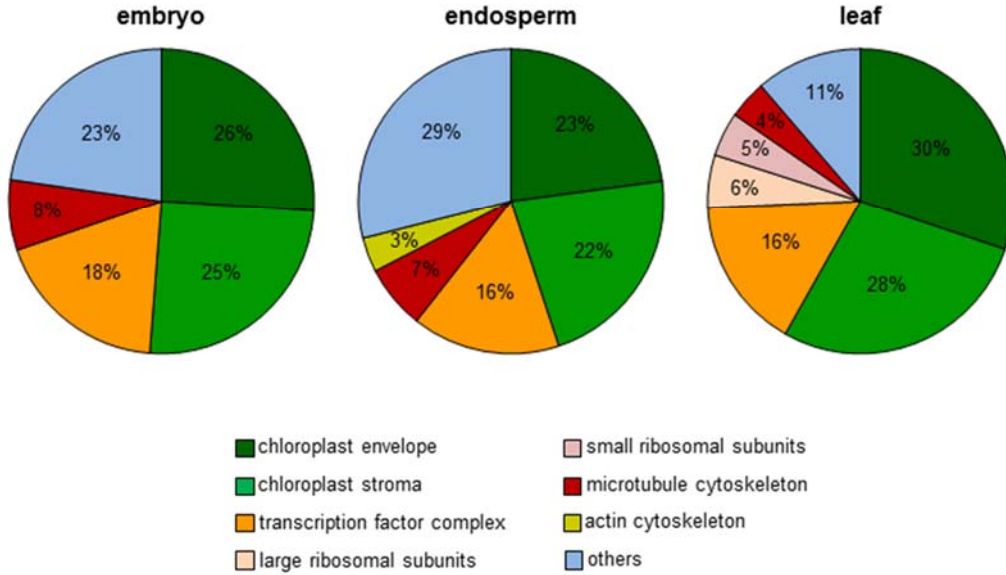

**Figure S4** – Pie charts demonstrate composition of cellular component of GO annotation at level 8. Subcategories with unigenes fewer than 100 are merged and placed under the category “others”. For embryo, there are 10 subcategories in the category others while for endosperm and leaf, there are 21 and 6 subcategories, respectively. Leaf transcriptome has higher portions of unigenes involving in the developments of chloroplast and ribosomal subunits, but has relatively fewer unigenes for microtubule cytoskeleton. Endosperm has relatively more proteins involving in the formation of actin cytoskeleton. Moreover, it contains many unique subcategories (denoted as others) that were not annotated for embryo or leaf (Table S5).

## GO annotation: Molecular function

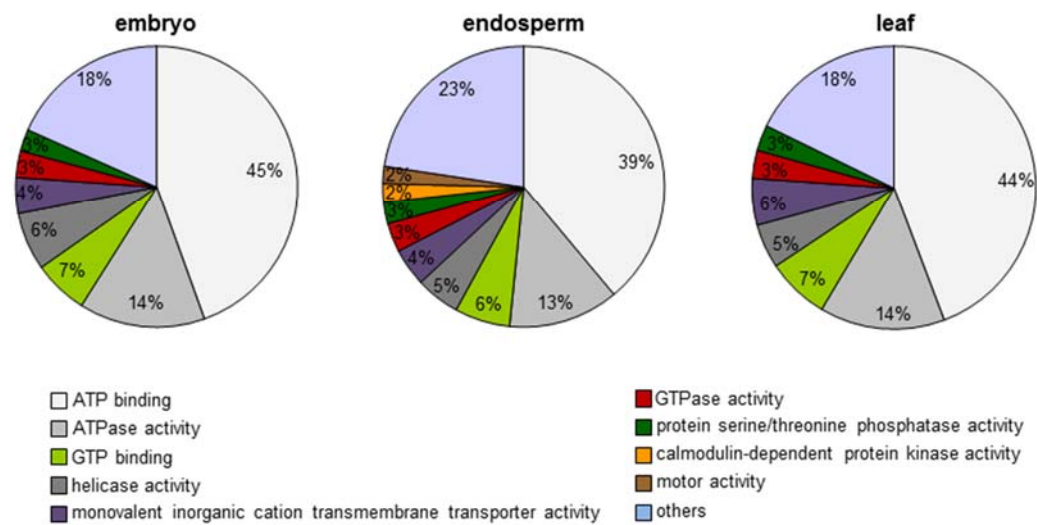

**Figure S5** – Pie charts demonstrate composition of molecular function of GO annotation at level 8. Subcategories with unigenes fewer than 100 are merged and placed under the category “others”. For embryo, there are 16 subcategories while for endosperm and leaf, there are 33 and 14 subcategories, respectively, in this category. ATP binding and ATPase activity together take up more than half of the GO terms. The highest percentage is found in embryo (59%), followed by leaf (58%), and the least is found in endosperms (52%). Compared to embryo and leaf, endosperm has higher proportion of proteins participating in calmodulin-dependent protein kinase and motor activities. Moreover, as many as 19 subcategories of endosperm were not annotated for embryo or leaf (Table S6).

**Table S1 List of primers used for sequence validation of factors involved in RNA-directed DNA methylation**

| Name    | Primer sequence (5' to 3')  |
|---------|-----------------------------|
| RPB1F   | TGGATGAGTTGCGTGTGGTTAT      |
| RPBR1   | TAGCCAAATGCCGGTAGTTGAC      |
| RPB1R2  | GTAGGGCTGTATGAAGGAGAAGTTG   |
| NRPE1F  | GAATCACCAGCAAAGCCTGTCT      |
| NRPE1R1 | TGCCTCGTGCGATTTCTT          |
| NRPE1R2 | CAGCATTTCGTGCCATCACAAG      |
| NRPD2F  | CCTCCTGGTTGTATCCTTGGTG      |
| NRPD2R  | CGAAAAGACAGCATGCCCAGAC      |
| RDRP6F  | CCTGGACACTGCCTGATTCATTC     |
| RDRP6R1 | GCTAAAAGATGATTCCCTCCT       |
| RDRP6R2 | GCCCGAATCAAACCTCATGCTTG     |
| RDRP6R3 | CTTGGTGTTCATCAGTAGCGTAATCC  |
| CMTF    | CGACGAGACGCCTAGTGTGATG      |
| CMTR1   | CTGATTGGCATTTCCTTTG         |
| CMTR2   | GACACTTGCTTAAACCATCCATAGG   |
| DRDF    | GATGTGGTTTGAGTGGAGTGAATATTG |
| DRDR    | CATCTTCTCTCAAATGGGGCTC      |
| DCL3bF  | GAATGACCCTTGACTGCTCTCG      |
| DCL3bR  | GAATGACCCTTGACTGCTCTCG      |
| DRMF    | TGGTGATAGGCTCGAACACATG      |
| DRMR    | GACTTCGCCAATAACCAGATC       |
| MET1F   | ACGAATTCAAAGCATCCAGGT       |
| METR    | GTTCCGGTAGGCACCATGGAATC     |
| NRPD1F  | TTGCTTATGGCTGCAGATTGC       |
| NRPD1R  | TGGAGATGAGATGGATGCTTGA      |



**Tables S2-S4**

Available for download as Excel files at

<http://www.g3journal.org/lookup/suppl/doi:10.1534/g3.114.013409/-/DC1>

Table S2. Complete gene expression lists (FPKM>1) of the embryo transcriptome.

Table S3 Complete gene expression lists (FPKM>1) of the endosperm transcriptome.

Table S4. Complete gene expression lists (FPKM>1) of the leaf transcriptome.

**Table S5 List of complete GO terms for cellular component at level 8**

| GO annotation at level 8                   | Tissue |           |      |
|--------------------------------------------|--------|-----------|------|
|                                            | embryo | endosperm | leaf |
| actin cytoskeleton                         | 79     | 123       | 63   |
| chloroplast envelope                       | 528    | 768       | 760  |
| chloroplast stroma                         | 512    | 741       | 818  |
| clathrin coated vesicle membrane           | -      | 28        | -    |
| clathrin vesicle coat                      | -      | 25        | -    |
| coated vesicle                             | 71     | 97        | 56   |
| condensed chromosome                       | -      | 36        | -    |
| COPI coated vesicle membrane               | -      | 30        | -    |
| COPI-coated vesicle                        | -      | 30        | -    |
| COPII vesicle coat                         | -      | 26        | -    |
| DNA-directed RNA polymerase II, holoenzyme | -      | 41        | -    |
| ER to Golgi transport vesicle membrane     | -      | 26        | -    |
| glyoxysome                                 | -      | 21        | -    |
| Golgi-associated vesicle                   | 36     | 49        | -    |
| heterotrimeric G-protein complex           | 47     | 59        | 55   |
| histone acetyltransferase complex          | 57     | 74        | 57   |
| large ribosomal subunit                    | 48     | 88        | 153  |
| mediator complex                           | 29     | 50        | 38   |
| microsome                                  | -      | 40        | 37   |
| microtubule cytoskeleton                   | 153    | 228       | 111  |
| nuclear body                               | 27     | 50        | -    |
| nuclear chromatin                          | -      | 28        | -    |
| peroxisomal membrane                       | -      | 33        | -    |
| small ribosomal subunit                    | 34     | 94        | 127  |
| transcription factor complex               | 376    | 527       | 437  |
| transport vesicle                          | 33     | 47        | -    |

\* A dash mark indicates that no unigene is found in that subcategory.

**Table S6 List of complete GO terms for molecular function at level 8**

| GO annotation at level 8                                       | Tissue    |        |      |
|----------------------------------------------------------------|-----------|--------|------|
|                                                                | endosperm | embryo | leaf |
| 3'-5'-exoribonuclease activity                                 | 27        | -      | -    |
| ATP binding                                                    | 2280      | 1908   | 1982 |
| ATPase activity                                                | 742       | 620    | 639  |
| calcium ion transmembrane transporter activity                 | 50        | 47     | 40   |
| calcium-transporting ATPase activity                           | 39        | 39     | -    |
| calmodulin-dependent protein kinase activity                   | 126       | 66     | 89   |
| cation:cation antiporter activity                              | 29        | 30     | 36   |
| copper ion transmembrane transporter activity                  | 27        | -      | -    |
| cyclin-dependent protein kinase activity                       | 23        | -      | -    |
| divalent inorganic cation transmembrane transporter activity   | 89        | 70     | 73   |
| endoribonuclease activity, producing 5'-phosphomonoesters      | 33        | -      | -    |
| exoribonuclease activity, producing 5'-phosphomonoesters       | 40        | 35     | -    |
| glucan endo-1,3-beta-D-glucosidase activity                    | 25        | -      | -    |
| GTP binding                                                    | 372       | 270    | 320  |
| GTPase activity                                                | 197       | 131    | 144  |
| helicase activity                                              | 298       | 287    | 227  |
| histone acetyltransferase activity                             | 70        | 53     | 56   |
| histone-lysine N-methyltransferase activity                    | 36        | 29     |      |
| monovalent inorganic cation transmembrane transporter activity | 255       | 179    | 241  |
| motor activity                                                 | 115       | 70     | 40   |
| non-membrane spanning protein tyrosine kinase activity         | 78        | 76     | 74   |
| organic phosphonate transmembrane transporter activity         | 27        | -      | -    |
| organic phosphonate transmembrane-transporting ATPase activity | 27        | -      | -    |
| organophosphate ester transmembrane transporter activity       | 27        | -      | -    |
| phosphate ion transmembrane transporter activity               | 30        | -      | -    |
| potassium channel activity                                     | 39        | -      | 37   |
| potassium ion transmembrane transporter activity               | 78        | 68     | 71   |
| protein serine/threonine phosphatase activity                  | 147       | 107    | 131  |
| protein tyrosine phosphatase activity                          | 31        | -      | -    |
| protein tyrosine/serine/threonine phosphatase activity         | 24        | -      | -    |
| proton-transporting ATPase activity, rotational mechanism      | 61        | 32     | 49   |
| Ran GTPase binding                                             | 28        | -      | -    |
| RNA polymerase II carboxy-terminal domain kinase activity      | 32        | -      | -    |
| sodium ion transmembrane transporter activity                  | 25        | -      | -    |
| solute:hydrogen antiporter activity                            | 24        | 28     | 37   |

|                                                         |    |    |    |
|---------------------------------------------------------|----|----|----|
| solute:hydrogen symporter activity                      | 54 | 48 | 65 |
| sugar:hydrogen symporter activity                       | 54 | 47 | 64 |
| transition metal ion transmembrane transporter activity | 71 | 48 | 64 |
| trehalose-phosphatase activity                          | 31 | -  | -  |
| ubiquitin-specific protease activity                    | 27 | -  | -  |
| voltage-gated anion channel activity                    | 30 | -  | -  |
| voltage-gated cation channel activity                   | 38 | -  | -  |

---

\* A dash mark indicates that no unigene is found in that subcategory.

**Table S7 List of complete GO terms for biological process at level 8**

| GO annotation at level 8                                           | tissue |           |      |
|--------------------------------------------------------------------|--------|-----------|------|
|                                                                    | embryo | endosperm | leaf |
| protein targeting                                                  | 611    | 919       | 784  |
| ribonucleotide metabolic process                                   | 555    | 772       | 655  |
| chromatin modification                                             | 474    | 719       | 419  |
| glucose catabolic process                                          | 423    | 704       | 675  |
| starch metabolic process                                           | 402    | 577       | 481  |
| nucleoside triphosphate metabolic process                          | 407    | 562       | 466  |
| ribonucleoside triphosphate metabolic process                      | 403    | 558       | 465  |
| purine ribonucleoside triphosphate metabolic process               | 402    | 554       | 463  |
| modification-dependent protein catabolic process                   | 315    | 535       | 392  |
| negative regulation of cellular macromolecule biosynthetic process | 330    | 529       | 304  |
| negative regulation of transcription, DNA-dependent                | 322    | 511       | 296  |
| protein modification by small protein conjugation                  | 330    | 507       | 364  |
| glucan biosynthetic process                                        | 327    | 453       | 392  |
| gluconeogenesis                                                    | 278    | 442       | 350  |
| purine nucleoside triphosphate catabolic process                   | 326    | 437       | 359  |
| positive regulation of transcription, DNA-dependent                | 287    | 411       | 339  |
| RNA splicing                                                       | 228    | 408       | 288  |
| negative regulation of gene expression, epigenetic                 | 246    | 390       | 192  |
| leaf development                                                   | 274    | 373       | 318  |
| ncRNA processing                                                   | 267    | 361       | 411  |
| regulation of translation                                          | 227    | 337       | 282  |
| purine ribonucleoside metabolic process                            | 239    | 331       | 255  |
| protein modification by small protein removal                      | 259    | 320       | 238  |
| DNA-dependent DNA replication                                      | 176    | 315       | 171  |
| trichoblast differentiation                                        | 237    | 313       | 214  |
| pyruvate metabolic process                                         | 223    | 313       | 383  |
| trichoblast maturation                                             | 235    | 307       | 209  |
| root hair cell differentiation                                     | 235    | 307       | 209  |
| posttranscriptional gene silencing by RNA                          | 228    | 303       | 185  |
| guanosine-containing compound metabolic process                    | 202    | 281       | 212  |
| proteasomal protein catabolic process                              | 169    | 274       | 194  |
| rRNA metabolic process                                             | 199    | 274       | 346  |
| NADP metabolic process                                             | 179    | 272       | 344  |
| rRNA processing                                                    | 198    | 272       | 343  |
| histone H3-K9 methylation                                          | 130    | 263       | 122  |

|                                                                              |     |     |     |
|------------------------------------------------------------------------------|-----|-----|-----|
| tRNA metabolic process                                                       | 211 | 258 | 260 |
| purine ribonucleoside catabolic process                                      | 186 | 254 | 186 |
| GTP catabolic process                                                        | 181 | 251 | 185 |
| guanosine-containing compound catabolic process                              | 181 | 251 | 185 |
| proteasome assembly                                                          | 119 | 245 | 179 |
| mRNA processing                                                              | 147 | 245 | 179 |
| thylakoid membrane organization                                              | 174 | 240 | 304 |
| isopentenyl diphosphate biosynthetic process, mevalonate-independent pathway | 175 | 235 | 305 |
| production of small RNA involved in gene silencing by RNA                    | 187 | 230 | 153 |
| dsRNA fragmentation                                                          | 187 | 230 | 153 |
| cell tip growth                                                              | 161 | 219 | 159 |
| chorismate metabolic process                                                 | 137 | 219 | 161 |
| nuclear import                                                               | 171 | 215 | 169 |
| protein import into nucleus                                                  | 171 | 215 | 168 |
| starch biosynthetic process                                                  | 157 | 212 | 257 |
| protein polymerization                                                       | 182 | 206 | 115 |
| RNA splicing, via endonucleolytic cleavage and ligation                      | 114 | 202 | 142 |
| methylation-dependent chromatin silencing                                    | 124 | 199 | 85  |
| divalent metal ion transport                                                 | 169 | 197 | 192 |
| regulation of DNA replication                                                | 86  | 190 | 79  |
| regulation of translational initiation                                       | 129 | 190 | 142 |
| ATP catabolic process                                                        | 145 | 186 | 174 |
| pyrimidine ribonucleotide biosynthetic process                               | 124 | 185 | 156 |
| amino acid transport                                                         | 113 | 185 | 154 |
| establishment of protein localization to vacuole                             | 113 | 185 | 140 |
| cellulose biosynthetic process                                               | 120 | 184 | 109 |
| mRNA catabolic process                                                       | 138 | 177 | 102 |
| protein N-linked glycosylation                                               | 158 | 176 | 104 |
| reciprocal DNA recombination                                                 | 146 | 175 | 109 |
| nuclear-transcribed mRNA catabolic process                                   | 135 | 174 | 97  |
| chromatin silencing by small RNA                                             | 95  | 171 | 77  |
| regulation of actin filament polymerization                                  | 158 | 166 | 89  |
| xylan metabolic process                                                      | 145 | 164 | 106 |
| establishment of protein localization to peroxisome                          | 91  | 161 | 152 |
| protein import into peroxisome matrix                                        | 89  | 157 | 148 |
| positive regulation of actin filament polymerization                         | 150 | 156 | 82  |
| RNA splicing, via transesterification reactions                              | 88  | 155 | 118 |
| purine ribonucleotide biosynthetic process                                   | 102 | 154 | 133 |

|                                                         |     |     |     |
|---------------------------------------------------------|-----|-----|-----|
| chromatin assembly or disassembly                       | 71  | 154 | 102 |
| virus induced gene silencing                            | 137 | 150 | 90  |
| protein autophosphorylation                             | 92  | 148 | 118 |
| regulation of phosphorylation                           | 123 | 144 | 116 |
| double-strand break repair                              | 109 | 143 | 72  |
| xylan biosynthetic process                              | 130 | 142 | 93  |
| glucuronoxylan metabolic process                        | 130 | 142 | 93  |
| nuclear mRNA splicing, via spliceosome                  | 76  | 141 | 101 |
| regulation of protein phosphorylation                   | 123 | 140 | 115 |
| protein myristoylation                                  | 93  | 139 | 110 |
| N-terminal protein lipidation                           | 93  | 139 | 110 |
| regulation of protein kinase activity                   | 123 | 135 | 113 |
| photosystem II assembly                                 | 93  | 134 | 189 |
| DNA packaging                                           | 47  | 130 | 86  |
| ribonucleoside triphosphate biosynthetic process        | 77  | 128 | 105 |
| nuclear export                                          | 101 | 126 | 99  |
| lactate metabolic process                               | 78  | 125 | 116 |
| purine nucleoside triphosphate biosynthetic process     | 76  | 124 | 103 |
| establishment of protein localization in mitochondrion  | 75  | 117 | 106 |
| glucosinolate biosynthetic process                      | 92  | 117 | 128 |
| tricarboxylic acid cycle                                | 69  | 117 | 120 |
| transition metal ion transport                          | 92  | 116 | 118 |
| lateral root development                                | 77  | 114 | 84  |
| mRNA export from nucleus                                | 89  | 110 | 86  |
| response to fructose stimulus                           | 77  | 107 | 109 |
| mitochondrial ATP synthesis coupled electron transport  | 56  | 105 | 85  |
| phosphatidylinositol biosynthetic process               | 62  | 102 | 80  |
| carotenoid metabolic process                            | 104 | 100 | 156 |
| tetraterpenoid metabolic process                        | 104 | 100 | 156 |
| recombinational repair                                  | 68  | 98  | 46  |
| double-strand break repair via homologous recombination | 68  | 98  | 46  |
| tetraterpenoid biosynthetic process                     | 98  | 97  | 152 |
| regulation of purine nucleotide metabolic process       | 81  | 95  | 65  |
| regulation of purine nucleotide catabolic process       | 81  | 95  | 65  |
| regulation of dephosphorylation                         | 58  | 93  | 124 |
| sodium ion transport                                    | 63  | 92  | 93  |
| jasmonic acid metabolic process                         | 57  | 91  | 88  |
| protein acetylation                                     | 65  | 90  | 66  |

|                                                      |    |    |     |
|------------------------------------------------------|----|----|-----|
| positive regulation of protein modification process  | 92 | 89 | 81  |
| regulation of G2/M transition of mitotic cell cycle  | 26 | 89 | -   |
| potassium ion transport                              | 79 | 89 | 75  |
| peptidyl-lysine modification                         | 67 | 88 | 71  |
| regulation of protein dephosphorylation              | 57 | 88 | 119 |
| embryonic meristem initiation                        | 75 | 88 | 51  |
| nucleosome assembly                                  | 26 | 88 | 62  |
| positive regulation of protein kinase activity       | 86 | 86 | 78  |
| positive regulation of phosphate metabolic process   | 86 | 86 | 78  |
| positive regulation of kinase activity               | 86 | 86 | 78  |
| tRNA processing                                      | 71 | 86 | 70  |
| jasmonic acid biosynthetic process                   | 49 | 83 | 73  |
| regulation of translational elongation               | 60 | 83 | 97  |
| establishment of protein localization to chloroplast | 66 | 82 | 90  |
| histone phosphorylation                              | 39 | 79 | -   |
| cotyledon development                                | 69 | 79 | 55  |
| sphingoid metabolic process                          | 50 | 78 | 53  |
| activation of MAPKK activity                         | 76 | 77 | 69  |
| mitotic recombination                                | 53 | 75 | 49  |
| histone acetylation                                  | 57 | 75 | 58  |
| peptidyl-proline modification                        | 54 | 75 | 58  |
| nitrate transport                                    | 42 | 68 | 78  |
| telomere maintenance in response to DNA damage       | 51 | 67 | 43  |
| ATP hydrolysis coupled proton transport              | 42 | 66 | 57  |
| ATP synthesis coupled proton transport               | 33 | 66 | 51  |
| chlorinated hydrocarbon metabolic process            | 51 | 65 | 62  |
| nucleoside monophosphate metabolic process           | 48 | 62 | 54  |
| reductive tricarboxylic acid cycle                   | 34 | 60 | 60  |
| response to glucose stimulus                         | 49 | 60 | 59  |
| phosphatidylglycerol biosynthetic process            | 40 | 59 | 88  |
| regulation of Ras protein signal transduction        | 57 | 59 | 46  |
| ribonucleoside monophosphate metabolic process       | 46 | 57 | 50  |
| ribonucleoside monophosphate biosynthetic process    | 45 | 56 | 50  |
| spindle assembly                                     | -  | 55 | -   |
| somatic cell DNA recombination                       | 42 | 53 | -   |
| diterpenoid metabolic process                        | 36 | 53 | 47  |
| regulation of Ras GTPase activity                    | 43 | 49 | 41  |
| postreplication repair                               | -  | 49 | 38  |



|                                                             |    |    |    |
|-------------------------------------------------------------|----|----|----|
| metal ion homeostasis                                       | 49 | 49 | 62 |
| regulation of seed germination                              | 39 | 48 | -  |
| glycosaminoglycan biosynthetic process                      | 42 | 47 | 47 |
| RNA 3'-end processing                                       | 36 | 47 | 37 |
| beta-glucan biosynthetic process                            | 33 | 44 | -  |
| (1->3)-beta-D-glucan metabolic process                      | 33 | 44 | -  |
| beta-glucan metabolic process                               | 33 | 44 | -  |
| negative regulation of protein modification process         | 27 | 42 | -  |
| phosphatidylinositol phosphorylation                        | 41 | 42 | -  |
| lithium ion transport                                       | 31 | 41 | 38 |
| sphingoid biosynthetic process                              | -  | 40 | -  |
| ammonium transport                                          | -  | 39 | 37 |
| phosphate ion transport                                     | -  | 38 | 38 |
| ceramide metabolic process                                  | 28 | 38 | -  |
| pyrimidine ribonucleoside metabolic process                 | 27 | 37 | -  |
| terpene catabolic process                                   | -  | 37 | -  |
| trichome branching                                          | -  | 37 | -  |
| monoterpene catabolic process                               | -  | 36 | -  |
| chloroplast fission                                         | -  | 36 | -  |
| monoterpene metabolic process                               | -  | 36 | -  |
| limonene metabolic process                                  | -  | 36 | -  |
| positive regulation of flavonoid biosynthetic process       | -  | 35 | 37 |
| tRNA modification                                           | -  | 34 | -  |
| nucleoside bisphosphate metabolic process                   | -  | 34 | -  |
| sesquiterpenoid metabolic process                           | 27 | 34 | 36 |
| abscisic acid metabolic process                             | 26 | 33 | -  |
| apocarotenoid metabolic process                             | 26 | 33 | -  |
| regulation of ion transmembrane transporter activity        | -  | 33 | -  |
| sesquiterpenoid biosynthetic process                        | -  | 32 | -  |
| nucleotide-excision repair                                  | -  | 32 | -  |
| apocarotenoid biosynthetic process                          | -  | 32 | -  |
| divalent inorganic cation homeostasis                       | 27 | 32 | 38 |
| regulation of transcription from RNA polymerase II promoter | 28 | 32 | -  |
| gibberellin metabolic process                               | -  | 31 | -  |
| purine nucleoside monophosphate biosynthetic process        | -  | 31 | -  |
| purine ribonucleoside monophosphate metabolic process       | -  | 31 | -  |
| negative regulation of phosphate metabolic process          | -  | 31 | -  |
| polar nucleus fusion                                        | -  | 30 | -  |

|                                                           |    |    |   |
|-----------------------------------------------------------|----|----|---|
| heterochromatin organization                              | -  | 30 | - |
| starch catabolic process                                  | 28 | 29 | - |
| DNA geometric change                                      | -  | 28 | - |
| positive regulation of translation                        | -  | 28 | - |
| pollen exine formation                                    | 30 | 28 | - |
| halogenated hydrocarbon catabolic process                 | -  | 28 | - |
| diterpenoid biosynthetic process                          | -  | 28 | - |
| malate metabolic process                                  | -  | 27 | - |
| organic phosphonate transport                             | -  | 27 | - |
| organophosphate ester transport                           | -  | 27 | - |
| DNA duplex unwinding                                      | -  | 26 | - |
| RNA polyadenylation                                       | -  | 26 | - |
| negative regulation of kinase activity                    | -  | 26 | - |
| negative regulation of protein kinase activity            | -  | 26 | - |
| chondroitin sulfate proteoglycan biosynthetic process     | -  | 26 | - |
| chloroplast RNA processing                                | -  | 25 | - |
| RNA-dependent DNA replication                             | -  | 25 | - |
| mRNA 3'-end processing                                    | -  | 25 | - |
| protein import into nucleus, docking                      | -  | 25 | - |
| triterpenoid biosynthetic process                         | -  | 25 | - |
| pyrimidine nucleoside monophosphate biosynthetic process  | -  | 25 | - |
| triterpenoid metabolic process                            | -  | 25 | - |
| glycosaminoglycan catabolic process                       | -  | 25 | - |
| iron ion homeostasis                                      | -  | 24 | - |
| base-excision repair                                      | -  | 24 | - |
| intracellular protein transmembrane transport             | -  | 24 | - |
| peptidyl-tyrosine dephosphorylation                       | -  | 24 | - |
| basipetal auxin transport                                 | -  | 24 | - |
| positive regulation of GTPase activity                    | -  | 24 | - |
| protein deacetylation                                     | -  | 23 | - |
| translational termination                                 | -  | 23 | - |
| pentacyclic triterpenoid metabolic process                | -  | 22 | - |
| pentacyclic triterpenoid biosynthetic process             | -  | 22 | - |
| pyrimidine ribonucleoside monophosphate metabolic process | -  | 22 | - |
| purine ribonucleoside biosynthetic process                | -  | 22 | - |
| monovalent inorganic cation homeostasis                   | -  | 21 | - |
| chloride transport                                        | -  | 21 | - |
| mismatch repair                                           | 32 | 21 | - |

\* A dash mark indicates that no unigene is found in that subcategory.

**Table S8 List of complete GO terms for biological process at level 8**

| Pathway                                                 | embryo | endosperm | leaf |
|---------------------------------------------------------|--------|-----------|------|
| Alanine, aspartate and glutamate metabolism             | 70     | 92        | 93   |
| alpha-Linolenic acid metabolism                         | 43     | 55        | 73   |
| Amino sugar and nucleotide sugar metabolism             | 116    | 193       | 158  |
| Aminoacyl-tRNA biosynthesis                             | 76     | 102       | 102  |
| Aminobenzoate degradation                               | 53     | 72        | 82   |
| Anthocyanin biosynthesis                                | 5      | 2         | 9    |
| Arachidonic acid metabolism                             | 33     | 41        | 50   |
| Arginine and proline metabolism                         | 113    | 133       | 122  |
| Ascorbate and aldarate metabolism                       | 48     | 66        | 57   |
| Atrazine degradation                                    | 5      | 4         | 4    |
| Benzoate degradation                                    | 11     | 30        | 23   |
| beta-Alanine metabolism                                 | 51     | 68        | 60   |
| beta-Lactam resistance                                  | 1      | 3         | 1    |
| Betalain biosynthesis                                   | 2      | 2         | 2    |
| Biosynthesis of ansamycins                              | 5      | 9         | 5    |
| Biosynthesis of siderophore group nonribosomal peptides | 0      | 3         | 3    |
| Biosynthesis of terpenoids and steroids                 | 1      | 0         | 1    |
| Biosynthesis of unsaturated fatty acids                 | 35     | 59        | 48   |
| Biosynthesis of vancomycin group antibiotics            | 3      | 7         | 6    |
| Biotin metabolism                                       | 18     | 28        | 28   |
| Butanoate metabolism                                    | 36     | 53        | 54   |
| Butirosin and neomycin biosynthesis                     | 5      | 12        | 5    |
| C5-Branched dibasic acid metabolism                     | 13     | 19        | 20   |
| Caffeine metabolism                                     | 9      | 12        | 27   |
| Caprolactam degradation                                 | 13     | 22        | 15   |
| Carbon fixation in photosynthetic organisms             | 93     | 140       | 142  |
| Carbon fixation pathways in prokaryotes                 | 65     | 104       | 102  |
| Carotenoid biosynthesis                                 | 12     | 11        | 13   |
| Chloroalkane and chloroalkene degradation               | 33     | 29        | 23   |
| Chlorocyclohexane and chlorobenzene degradation         | 6      | 9         | 8    |
| Citrate cycle (TCA cycle)                               | 71     | 105       | 116  |
| Cutin, suberine and wax biosynthesis                    | 6      | 4         | 8    |
| Cyanoamino acid metabolism                              | 27     | 37        | 52   |
| Cysteine and methionine metabolism                      | 97     | 112       | 112  |
| D-Alanine metabolism                                    | 6      | 4         | 4    |
| D-Arginine and D-ornithine metabolism                   | 3      | 2         | 3    |

|                                                                       |     |     |     |
|-----------------------------------------------------------------------|-----|-----|-----|
| D-Glutamine and D-glutamate metabolism                                | 5   | 8   | 4   |
| Diterpenoid biosynthesis                                              | 9   | 5   | 3   |
| Drug metabolism - cytochrome P450                                     | 39  | 36  | 46  |
| Drug metabolism - other enzymes                                       | 72  | 92  | 91  |
| Ether lipid metabolism                                                | 34  | 42  | 36  |
| Ethylbenzene degradation                                              | 3   | 6   | 5   |
| Fatty acid biosynthesis                                               | 37  | 68  | 53  |
| Fatty acid elongation                                                 | 17  | 35  | 25  |
| Fatty acid metabolism                                                 | 70  | 94  | 93  |
| Flavone and flavonol biosynthesis                                     | 5   | 5   | 13  |
| Flavonoid biosynthesis                                                | 31  | 32  | 71  |
| Fluorobenzoate degradation                                            | 4   | 8   | 7   |
| Folate biosynthesis                                                   | 12  | 14  | 14  |
| Fructose and mannose metabolism                                       | 65  | 103 | 99  |
| Galactose metabolism                                                  | 89  | 108 | 111 |
| Geraniol degradation                                                  | 18  | 30  | 23  |
| Glucosinolate biosynthesis                                            | 4   | 3   | 5   |
| Glutathione metabolism                                                | 92  | 95  | 114 |
| Glycerolipid metabolism                                               | 130 | 132 | 130 |
| Glycerophospholipid metabolism                                        | 100 | 136 | 110 |
| Glycine, serine and threonine metabolism                              | 90  | 124 | 126 |
| Glycolysis Gluconeogenesis                                            | 155 | 245 | 205 |
| Glycosaminoglycan biosynthesis - chondroitin sulfate dermatan sulfate | 22  | 26  | 22  |
| Glycosaminoglycan biosynthesis - heparan sulfate heparin              | 33  | 39  | 32  |
| Glycosaminoglycan biosynthesis - keratan sulfate                      | 2   | 1   | 0   |
| Glycosaminoglycan degradation                                         | 23  | 25  | 19  |
| Glycosphingolipid biosynthesis - ganglio series                       | 22  | 24  | 17  |
| Glycosphingolipid biosynthesis - globo series                         | 17  | 18  | 14  |
| Glycosphingolipid biosynthesis - lacto and neolacto series            | 4   | 7   | 2   |
| Glycosylphosphatidylinositol(GPI)-anchor biosynthesis                 | 3   | 2   | 2   |
| Glyoxylate and dicarboxylate metabolism                               | 89  | 129 | 154 |
| Histidine metabolism                                                  | 28  | 31  | 27  |
| Indole alkaloid biosynthesis                                          | 8   | 10  | 15  |
| Inositol phosphate metabolism                                         | 86  | 97  | 71  |
| Insect hormone biosynthesis                                           | 0   | 0   | 1   |
| Isoflavonoid biosynthesis                                             | 0   | 2   | 5   |
| Isoquinoline alkaloid biosynthesis                                    | 24  | 38  | 31  |
| Limonene and pinene degradation                                       | 24  | 36  | 26  |

|                                                     |     |     |     |
|-----------------------------------------------------|-----|-----|-----|
| Linoleic acid metabolism                            | 19  | 24  | 54  |
| Lipoic acid metabolism                              | 8   | 12  | 9   |
| Lipopolysaccharide biosynthesis                     | 5   | 11  | 9   |
| Lysine biosynthesis                                 | 21  | 24  | 25  |
| Lysine degradation                                  | 58  | 88  | 61  |
| Metabolism of xenobiotics by cytochrome P450        | 37  | 38  | 49  |
| Methane metabolism                                  | 101 | 240 | 183 |
| Monoterpenoid biosynthesis                          | 1   | 5   | 6   |
| mTOR signaling pathway                              | 17  | 18  | 14  |
| Mucin type O-Glycan biosynthesis                    | 2   | 1   | 0   |
| Naphthalene degradation                             | 13  | 7   | 7   |
| N-Glycan biosynthesis                               | 29  | 35  | 27  |
| Nicotinate and nicotinamide metabolism              | 24  | 17  | 30  |
| Nitrogen metabolism                                 | 112 | 190 | 183 |
| Novobiocin biosynthesis                             | 19  | 25  | 17  |
| One carbon pool by folate                           | 32  | 36  | 42  |
| Other glycan degradation                            | 52  | 45  | 40  |
| Other types of O-glycan biosynthesis                | 7   | 7   | 10  |
| Oxidative phosphorylation                           | 94  | 163 | 149 |
| Pantothenate and CoA biosynthesis                   | 35  | 39  | 41  |
| Penicillin and cephalosporin biosynthesis           | 2   | 4   | 3   |
| Pentose and glucuronate interconversions            | 64  | 101 | 62  |
| Pentose phosphate pathway                           | 74  | 114 | 130 |
| Peptidoglycan biosynthesis                          | 10  | 31  | 5   |
| Phenylalanine metabolism                            | 100 | 139 | 114 |
| Phenylalanine, tyrosine and tryptophan biosynthesis | 69  | 84  | 77  |
| Phenylpropanoid biosynthesis                        | 53  | 77  | 84  |
| Phosphatidylinositol signaling system               | 109 | 107 | 74  |
| Phosphonate and phosphinate metabolism              | 2   | 9   | 5   |
| Photosynthesis                                      | 3   | 5   | 3   |
| Polyketide sugar unit biosynthesis                  | 7   | 11  | 10  |
| Porphyrin and chlorophyll metabolism                | 65  | 73  | 87  |
| Primary bile acid biosynthesis                      | 5   | 13  | 5   |
| Propanoate metabolism                               | 55  | 83  | 75  |
| Purine metabolism                                   | 351 | 415 | 412 |
| Pyrimidine metabolism                               | 148 | 197 | 172 |
| Pyruvate metabolism                                 | 107 | 162 | 170 |
| Retinol metabolism                                  | 22  | 22  | 37  |

|                                                        |             |             |             |
|--------------------------------------------------------|-------------|-------------|-------------|
| Riboflavin metabolism                                  | 31          | 44          | 45          |
| Selenocompound metabolism                              | 36          | 38          | 37          |
| Sesquiterpenoid and triterpenoid biosynthesis          | 1           | 0           | 1           |
| Sphingolipid metabolism                                | 72          | 70          | 63          |
| Starch and sucrose metabolism                          | 274         | 409         | 272         |
| Steroid biosynthesis                                   | 19          | 37          | 34          |
| Steroid degradation                                    | 7           | 6           | 8           |
| Steroid hormone biosynthesis                           | 11          | 32          | 40          |
| Stilbenoid, diarylheptanoid and gingerol biosynthesis  | 4           | 6           | 10          |
| Streptomycin biosynthesis                              | 18          | 47          | 38          |
| Styrene degradation                                    | 17          | 18          | 19          |
| Sulfur metabolism                                      | 50          | 64          | 68          |
| Synthesis and degradation of ketone bodies             | 8           | 10          | 14          |
| T cell receptor signaling pathway                      | 120         | 137         | 118         |
| Taurine and hypotaurine metabolism                     | 7           | 9           | 8           |
| Terpenoid backbone biosynthesis                        | 33          | 52          | 57          |
| Tetracycline biosynthesis                              | 9           | 14          | 12          |
| Thiamine metabolism                                    | 79          | 78          | 81          |
| Toluene degradation                                    | 11          | 19          | 17          |
| Tropane, piperidine and pyridine alkaloid biosynthesis | 28          | 42          | 29          |
| Tryptophan metabolism                                  | 71          | 88          | 87          |
| Tyrosine metabolism                                    | 53          | 68          | 52          |
| Ubiquinone and other terpenoid-quinone biosynthesis    | 23          | 31          | 31          |
| Valine, leucine and isoleucine biosynthesis            | 19          | 25          | 22          |
| Valine, leucine and isoleucine degradation             | 66          | 87          | 87          |
| Various types of N-glycan biosynthesis                 | 22          | 26          | 20          |
| Vitamin B6 metabolism                                  | 8           | 21          | 17          |
| Xylene degradation                                     | 3           | 1           | 2           |
| Zeatin biosynthesis                                    | 4           | 6           | 8           |
| <b>Total</b>                                           | <b>5686</b> | <b>7707</b> | <b>7231</b> |
