# Supplementary material for: De Novo Transcriptome Sequence Assembly from Coconut Leaves and Seeds with a Focus on Factors Involved in RNA-Directed DNA Methylation
Source: PubMed Central journal article supplement (PMC4232540; doi:10.1534/g3.114.013409), 2014-09-04
Supplement: supp_g3.114.013409_FigureS2.pdf [file supp_g3.114.013409_FigureS2.pdf]

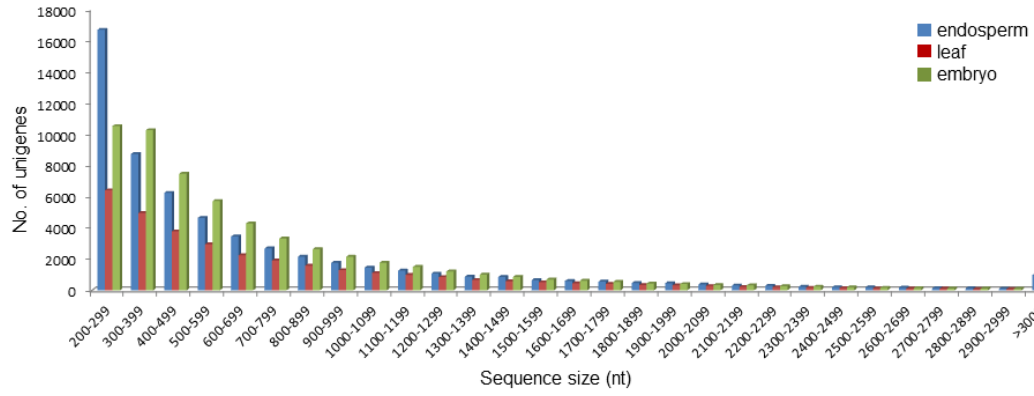

**Figure S2** – Length distribution of total unigenes found in three coconut tissues.
