# Supplementary material for: De Novo Transcriptome Sequence Assembly from Coconut Leaves and Seeds with a Focus on Factors Involved in RNA-Directed DNA Methylation
Source: PubMed Central journal article supplement (PMC4232540; doi:10.1534/g3.114.013409), 2014-09-04
Supplement: supp_g3.114.013409_TableS1.pdf [file supp_g3.114.013409_TableS1.pdf]

**Table S1 List of primers used for sequence validation of factors involved in RNA-directed DNA methylation**

| Name    | Primer sequence (5' to 3')  |
|---------|-----------------------------|
| RPB1F   | TGGATGAGTTGCGTGTGGTTAT      |
| RPBR1   | TAGCCAAATGCCGGTAGTTGAC      |
| RPB1R2  | GTAGGGCTGTATGAAGGAGAAGTTG   |
| NRPE1F  | GAATCACCAGCAAAGCCTGTCT      |
| NRPE1R1 | TGCCTCGTGCGATTTCTT          |
| NRPE1R2 | CAGCATTTCGTGCCATCACAAG      |
| NRPD2F  | CCTCCTGGTTGTATCCTTGGTG      |
| NRPD2R  | CGAAAAGACAGCATGCCCAGAC      |
| RDRP6F  | CCTGGACACTGCCTGATTCATTC     |
| RDRP6R1 | GCTAAAAGATGATTCCCTCCT       |
| RDRP6R2 | GCCCGAATCAAACCTCATGCTTG     |
| RDRP6R3 | CTTGGTGCATCAGTAGCGTAATCC    |
| CMTF    | CGACGAGACGCCTAGTGTGATG      |
| CMTR1   | CTGATTGGCATTGCCTTTG         |
| CMTR2   | GACACTTGCTTAAACCATCCATAGG   |
| DRDF    | GATGTGGTTTGAGTGGAGTGAATATTG |
| DRDR    | CATCTTCTCTCAAATGGGGCTC      |
| DCL3bF  | GAATGACCCTTGACTGCTCTCG      |
| DCL3bR  | GAATGACCCTTGACTGCTCTCG      |
| DRMF    | TGGTGATAGGCTCGAACACATG      |
| DRMR    | GACTTCGCCAATAACCAGATC       |
| MET1F   | ACGAATTCAAAGCATCCAGGT       |
| METR    | GTTCCGGTAGGCACCATGGAATC     |
| NRPD1F  | TTGCTTATGGCTGCAGATTGC       |
| NRPD1R  | TGGAGATGAGATGGATGCTTGA      |
