# Supplementary material for: De Novo Transcriptome Sequence Assembly from Coconut Leaves and Seeds with a Focus on Factors Involved in RNA-Directed DNA Methylation
Source: PubMed Central journal article supplement (PMC4232540; doi:10.1534/g3.114.013409), 2014-09-04
Supplement: supp_g3.114.013409_TableS5.pdf [file supp_g3.114.013409_TableS5.pdf]

**Table S5 List of complete GO terms for cellular component at level 8**

| GO annotation at level 8                   | Tissue |           |      |
|--------------------------------------------|--------|-----------|------|
|                                            | embryo | endosperm | leaf |
| actin cytoskeleton                         | 79     | 123       | 63   |
| chloroplast envelope                       | 528    | 768       | 760  |
| chloroplast stroma                         | 512    | 741       | 818  |
| clathrin coated vesicle membrane           | -      | 28        | -    |
| clathrin vesicle coat                      | -      | 25        | -    |
| coated vesicle                             | 71     | 97        | 56   |
| condensed chromosome                       | -      | 36        | -    |
| COPI coated vesicle membrane               | -      | 30        | -    |
| COPI-coated vesicle                        | -      | 30        | -    |
| COPII vesicle coat                         | -      | 26        | -    |
| DNA-directed RNA polymerase II, holoenzyme | -      | 41        | -    |
| ER to Golgi transport vesicle membrane     | -      | 26        | -    |
| glyoxysome                                 | -      | 21        | -    |
| Golgi-associated vesicle                   | 36     | 49        | -    |
| heterotrimeric G-protein complex           | 47     | 59        | 55   |
| histone acetyltransferase complex          | 57     | 74        | 57   |
| large ribosomal subunit                    | 48     | 88        | 153  |
| mediator complex                           | 29     | 50        | 38   |
| microsome                                  | -      | 40        | 37   |
| microtubule cytoskeleton                   | 153    | 228       | 111  |
| nuclear body                               | 27     | 50        | -    |
| nuclear chromatin                          | -      | 28        | -    |
| peroxisomal membrane                       | -      | 33        | -    |
| small ribosomal subunit                    | 34     | 94        | 127  |
| transcription factor complex               | 376    | 527       | 437  |
| transport vesicle                          | 33     | 47        | -    |

\* A dash mark indicates that no unigene is found in that subcategory.
