# Supplementary material for: De Novo Transcriptome Sequence Assembly from Coconut Leaves and Seeds with a Focus on Factors Involved in RNA-Directed DNA Methylation
Source: PubMed Central journal article supplement (PMC4232540; doi:10.1534/g3.114.013409), 2014-09-04
Supplement: supp_g3.114.013409_TableS6.pdf [file supp_g3.114.013409_TableS6.pdf]

**Table S6 List of complete GO terms for molecular function at level 8**

| GO annotation at level 8                                       | Tissue    |        |      |
|----------------------------------------------------------------|-----------|--------|------|
|                                                                | endosperm | embryo | leaf |
| 3'-5'-exoribonuclease activity                                 | 27        | -      | -    |
| ATP binding                                                    | 2280      | 1908   | 1982 |
| ATPase activity                                                | 742       | 620    | 639  |
| calcium ion transmembrane transporter activity                 | 50        | 47     | 40   |
| calcium-transporting ATPase activity                           | 39        | 39     | -    |
| calmodulin-dependent protein kinase activity                   | 126       | 66     | 89   |
| cation:cation antiporter activity                              | 29        | 30     | 36   |
| copper ion transmembrane transporter activity                  | 27        | -      | -    |
| cyclin-dependent protein kinase activity                       | 23        | -      | -    |
| divalent inorganic cation transmembrane transporter activity   | 89        | 70     | 73   |
| endoribonuclease activity, producing 5'-phosphomonoesters      | 33        | -      | -    |
| exoribonuclease activity, producing 5'-phosphomonoesters       | 40        | 35     | -    |
| glucan endo-1,3-beta-D-glucosidase activity                    | 25        | -      | -    |
| GTP binding                                                    | 372       | 270    | 320  |
| GTPase activity                                                | 197       | 131    | 144  |
| helicase activity                                              | 298       | 287    | 227  |
| histone acetyltransferase activity                             | 70        | 53     | 56   |
| histone-lysine N-methyltransferase activity                    | 36        | 29     |      |
| monovalent inorganic cation transmembrane transporter activity | 255       | 179    | 241  |
| motor activity                                                 | 115       | 70     | 40   |
| non-membrane spanning protein tyrosine kinase activity         | 78        | 76     | 74   |
| organic phosphonate transmembrane transporter activity         | 27        | -      | -    |
| organic phosphonate transmembrane-transporting ATPase activity | 27        | -      | -    |
| organophosphate ester transmembrane transporter activity       | 27        | -      | -    |
| phosphate ion transmembrane transporter activity               | 30        | -      | -    |
| potassium channel activity                                     | 39        | -      | 37   |
| potassium ion transmembrane transporter activity               | 78        | 68     | 71   |
| protein serine/threonine phosphatase activity                  | 147       | 107    | 131  |
| protein tyrosine phosphatase activity                          | 31        | -      | -    |
| protein tyrosine/serine/threonine phosphatase activity         | 24        | -      | -    |
| proton-transporting ATPase activity, rotational mechanism      | 61        | 32     | 49   |
| Ran GTPase binding                                             | 28        | -      | -    |
| RNA polymerase II carboxy-terminal domain kinase activity      | 32        | -      | -    |
| sodium ion transmembrane transporter activity                  | 25        | -      | -    |
| solute:hydrogen antiporter activity                            | 24        | 28     | 37   |

|                                                         |    |    |    |
|---------------------------------------------------------|----|----|----|
| solute:hydrogen symporter activity                      | 54 | 48 | 65 |
| sugar:hydrogen symporter activity                       | 54 | 47 | 64 |
| transition metal ion transmembrane transporter activity | 71 | 48 | 64 |
| trehalose-phosphatase activity                          | 31 | -  | -  |
| ubiquitin-specific protease activity                    | 27 | -  | -  |
| voltage-gated anion channel activity                    | 30 | -  | -  |
| voltage-gated cation channel activity                   | 38 | -  | -  |

---

\* A dash mark indicates that no unigene is found in that subcategory.
