# Supplementary material for: De Novo Transcriptome Sequence Assembly from Coconut Leaves and Seeds with a Focus on Factors Involved in RNA-Directed DNA Methylation
Source: PubMed Central journal article supplement (PMC4232540; doi:10.1534/g3.114.013409), 2014-09-04
Supplement: supp_g3.114.013409_TableS7.pdf [file supp_g3.114.013409_TableS7.pdf]

**Table S7 List of complete GO terms for biological process at level 8**

| GO annotation at level 8                                           | tissue |           |      |
|--------------------------------------------------------------------|--------|-----------|------|
|                                                                    | embryo | endosperm | leaf |
| protein targeting                                                  | 611    | 919       | 784  |
| ribonucleotide metabolic process                                   | 555    | 772       | 655  |
| chromatin modification                                             | 474    | 719       | 419  |
| glucose catabolic process                                          | 423    | 704       | 675  |
| starch metabolic process                                           | 402    | 577       | 481  |
| nucleoside triphosphate metabolic process                          | 407    | 562       | 466  |
| ribonucleoside triphosphate metabolic process                      | 403    | 558       | 465  |
| purine ribonucleoside triphosphate metabolic process               | 402    | 554       | 463  |
| modification-dependent protein catabolic process                   | 315    | 535       | 392  |
| negative regulation of cellular macromolecule biosynthetic process | 330    | 529       | 304  |
| negative regulation of transcription, DNA-dependent                | 322    | 511       | 296  |
| protein modification by small protein conjugation                  | 330    | 507       | 364  |
| glucan biosynthetic process                                        | 327    | 453       | 392  |
| gluconeogenesis                                                    | 278    | 442       | 350  |
| purine nucleoside triphosphate catabolic process                   | 326    | 437       | 359  |
| positive regulation of transcription, DNA-dependent                | 287    | 411       | 339  |
| RNA splicing                                                       | 228    | 408       | 288  |
| negative regulation of gene expression, epigenetic                 | 246    | 390       | 192  |
| leaf development                                                   | 274    | 373       | 318  |
| ncRNA processing                                                   | 267    | 361       | 411  |
| regulation of translation                                          | 227    | 337       | 282  |
| purine ribonucleoside metabolic process                            | 239    | 331       | 255  |
| protein modification by small protein removal                      | 259    | 320       | 238  |
| DNA-dependent DNA replication                                      | 176    | 315       | 171  |
| trichoblast differentiation                                        | 237    | 313       | 214  |
| pyruvate metabolic process                                         | 223    | 313       | 383  |
| trichoblast maturation                                             | 235    | 307       | 209  |
| root hair cell differentiation                                     | 235    | 307       | 209  |
| posttranscriptional gene silencing by RNA                          | 228    | 303       | 185  |
| guanosine-containing compound metabolic process                    | 202    | 281       | 212  |
| proteasomal protein catabolic process                              | 169    | 274       | 194  |
| rRNA metabolic process                                             | 199    | 274       | 346  |
| NADP metabolic process                                             | 179    | 272       | 344  |
| rRNA processing                                                    | 198    | 272       | 343  |
| histone H3-K9 methylation                                          | 130    | 263       | 122  |

|                                                                              |     |     |     |
|------------------------------------------------------------------------------|-----|-----|-----|
| tRNA metabolic process                                                       | 211 | 258 | 260 |
| purine ribonucleoside catabolic process                                      | 186 | 254 | 186 |
| GTP catabolic process                                                        | 181 | 251 | 185 |
| guanosine-containing compound catabolic process                              | 181 | 251 | 185 |
| proteasome assembly                                                          | 119 | 245 | 179 |
| mRNA processing                                                              | 147 | 245 | 179 |
| thylakoid membrane organization                                              | 174 | 240 | 304 |
| isopentenyl diphosphate biosynthetic process, mevalonate-independent pathway | 175 | 235 | 305 |
| production of small RNA involved in gene silencing by RNA                    | 187 | 230 | 153 |
| dsRNA fragmentation                                                          | 187 | 230 | 153 |
| cell tip growth                                                              | 161 | 219 | 159 |
| chorismate metabolic process                                                 | 137 | 219 | 161 |
| nuclear import                                                               | 171 | 215 | 169 |
| protein import into nucleus                                                  | 171 | 215 | 168 |
| starch biosynthetic process                                                  | 157 | 212 | 257 |
| protein polymerization                                                       | 182 | 206 | 115 |
| RNA splicing, via endonucleolytic cleavage and ligation                      | 114 | 202 | 142 |
| methylation-dependent chromatin silencing                                    | 124 | 199 | 85  |
| divalent metal ion transport                                                 | 169 | 197 | 192 |
| regulation of DNA replication                                                | 86  | 190 | 79  |
| regulation of translational initiation                                       | 129 | 190 | 142 |
| ATP catabolic process                                                        | 145 | 186 | 174 |
| pyrimidine ribonucleotide biosynthetic process                               | 124 | 185 | 156 |
| amino acid transport                                                         | 113 | 185 | 154 |
| establishment of protein localization to vacuole                             | 113 | 185 | 140 |
| cellulose biosynthetic process                                               | 120 | 184 | 109 |
| mRNA catabolic process                                                       | 138 | 177 | 102 |
| protein N-linked glycosylation                                               | 158 | 176 | 104 |
| reciprocal DNA recombination                                                 | 146 | 175 | 109 |
| nuclear-transcribed mRNA catabolic process                                   | 135 | 174 | 97  |
| chromatin silencing by small RNA                                             | 95  | 171 | 77  |
| regulation of actin filament polymerization                                  | 158 | 166 | 89  |
| xylan metabolic process                                                      | 145 | 164 | 106 |
| establishment of protein localization to peroxisome                          | 91  | 161 | 152 |
| protein import into peroxisome matrix                                        | 89  | 157 | 148 |
| positive regulation of actin filament polymerization                         | 150 | 156 | 82  |
| RNA splicing, via transesterification reactions                              | 88  | 155 | 118 |
| purine ribonucleotide biosynthetic process                                   | 102 | 154 | 133 |

|                                                         |     |     |     |
|---------------------------------------------------------|-----|-----|-----|
| chromatin assembly or disassembly                       | 71  | 154 | 102 |
| virus induced gene silencing                            | 137 | 150 | 90  |
| protein autophosphorylation                             | 92  | 148 | 118 |
| regulation of phosphorylation                           | 123 | 144 | 116 |
| double-strand break repair                              | 109 | 143 | 72  |
| xylan biosynthetic process                              | 130 | 142 | 93  |
| glucuronoxylan metabolic process                        | 130 | 142 | 93  |
| nuclear mRNA splicing, via spliceosome                  | 76  | 141 | 101 |
| regulation of protein phosphorylation                   | 123 | 140 | 115 |
| protein myristoylation                                  | 93  | 139 | 110 |
| N-terminal protein lipidation                           | 93  | 139 | 110 |
| regulation of protein kinase activity                   | 123 | 135 | 113 |
| photosystem II assembly                                 | 93  | 134 | 189 |
| DNA packaging                                           | 47  | 130 | 86  |
| ribonucleoside triphosphate biosynthetic process        | 77  | 128 | 105 |
| nuclear export                                          | 101 | 126 | 99  |
| lactate metabolic process                               | 78  | 125 | 116 |
| purine nucleoside triphosphate biosynthetic process     | 76  | 124 | 103 |
| establishment of protein localization in mitochondrion  | 75  | 117 | 106 |
| glucosinolate biosynthetic process                      | 92  | 117 | 128 |
| tricarboxylic acid cycle                                | 69  | 117 | 120 |
| transition metal ion transport                          | 92  | 116 | 118 |
| lateral root development                                | 77  | 114 | 84  |
| mRNA export from nucleus                                | 89  | 110 | 86  |
| response to fructose stimulus                           | 77  | 107 | 109 |
| mitochondrial ATP synthesis coupled electron transport  | 56  | 105 | 85  |
| phosphatidylinositol biosynthetic process               | 62  | 102 | 80  |
| carotenoid metabolic process                            | 104 | 100 | 156 |
| tetraterpenoid metabolic process                        | 104 | 100 | 156 |
| recombinational repair                                  | 68  | 98  | 46  |
| double-strand break repair via homologous recombination | 68  | 98  | 46  |
| tetraterpenoid biosynthetic process                     | 98  | 97  | 152 |
| regulation of purine nucleotide metabolic process       | 81  | 95  | 65  |
| regulation of purine nucleotide catabolic process       | 81  | 95  | 65  |
| regulation of dephosphorylation                         | 58  | 93  | 124 |
| sodium ion transport                                    | 63  | 92  | 93  |
| jasmonic acid metabolic process                         | 57  | 91  | 88  |
| protein acetylation                                     | 65  | 90  | 66  |

|                                                      |    |    |     |
|------------------------------------------------------|----|----|-----|
| positive regulation of protein modification process  | 92 | 89 | 81  |
| regulation of G2/M transition of mitotic cell cycle  | 26 | 89 | -   |
| potassium ion transport                              | 79 | 89 | 75  |
| peptidyl-lysine modification                         | 67 | 88 | 71  |
| regulation of protein dephosphorylation              | 57 | 88 | 119 |
| embryonic meristem initiation                        | 75 | 88 | 51  |
| nucleosome assembly                                  | 26 | 88 | 62  |
| positive regulation of protein kinase activity       | 86 | 86 | 78  |
| positive regulation of phosphate metabolic process   | 86 | 86 | 78  |
| positive regulation of kinase activity               | 86 | 86 | 78  |
| tRNA processing                                      | 71 | 86 | 70  |
| jasmonic acid biosynthetic process                   | 49 | 83 | 73  |
| regulation of translational elongation               | 60 | 83 | 97  |
| establishment of protein localization to chloroplast | 66 | 82 | 90  |
| histone phosphorylation                              | 39 | 79 | -   |
| cotyledon development                                | 69 | 79 | 55  |
| sphingoid metabolic process                          | 50 | 78 | 53  |
| activation of MAPKK activity                         | 76 | 77 | 69  |
| mitotic recombination                                | 53 | 75 | 49  |
| histone acetylation                                  | 57 | 75 | 58  |
| peptidyl-proline modification                        | 54 | 75 | 58  |
| nitrate transport                                    | 42 | 68 | 78  |
| telomere maintenance in response to DNA damage       | 51 | 67 | 43  |
| ATP hydrolysis coupled proton transport              | 42 | 66 | 57  |
| ATP synthesis coupled proton transport               | 33 | 66 | 51  |
| chlorinated hydrocarbon metabolic process            | 51 | 65 | 62  |
| nucleoside monophosphate metabolic process           | 48 | 62 | 54  |
| reductive tricarboxylic acid cycle                   | 34 | 60 | 60  |
| response to glucose stimulus                         | 49 | 60 | 59  |
| phosphatidylglycerol biosynthetic process            | 40 | 59 | 88  |
| regulation of Ras protein signal transduction        | 57 | 59 | 46  |
| ribonucleoside monophosphate metabolic process       | 46 | 57 | 50  |
| ribonucleoside monophosphate biosynthetic process    | 45 | 56 | 50  |
| spindle assembly                                     | -  | 55 | -   |
| somatic cell DNA recombination                       | 42 | 53 | -   |
| diterpenoid metabolic process                        | 36 | 53 | 47  |
| regulation of Ras GTPase activity                    | 43 | 49 | 41  |
| postreplication repair                               | -  | 49 | 38  |

|                                                             |    |    |    |
|-------------------------------------------------------------|----|----|----|
| metal ion homeostasis                                       | 49 | 49 | 62 |
| regulation of seed germination                              | 39 | 48 | -  |
| glycosaminoglycan biosynthetic process                      | 42 | 47 | 47 |
| RNA 3'-end processing                                       | 36 | 47 | 37 |
| beta-glucan biosynthetic process                            | 33 | 44 | -  |
| (1->3)-beta-D-glucan metabolic process                      | 33 | 44 | -  |
| beta-glucan metabolic process                               | 33 | 44 | -  |
| negative regulation of protein modification process         | 27 | 42 | -  |
| phosphatidylinositol phosphorylation                        | 41 | 42 | -  |
| lithium ion transport                                       | 31 | 41 | 38 |
| sphingoid biosynthetic process                              | -  | 40 | -  |
| ammonium transport                                          | -  | 39 | 37 |
| phosphate ion transport                                     | -  | 38 | 38 |
| ceramide metabolic process                                  | 28 | 38 | -  |
| pyrimidine ribonucleoside metabolic process                 | 27 | 37 | -  |
| terpene catabolic process                                   | -  | 37 | -  |
| trichome branching                                          | -  | 37 | -  |
| monoterpene catabolic process                               | -  | 36 | -  |
| chloroplast fission                                         | -  | 36 | -  |
| monoterpene metabolic process                               | -  | 36 | -  |
| limonene metabolic process                                  | -  | 36 | -  |
| positive regulation of flavonoid biosynthetic process       | -  | 35 | 37 |
| tRNA modification                                           | -  | 34 | -  |
| nucleoside bisphosphate metabolic process                   | -  | 34 | -  |
| sesquiterpenoid metabolic process                           | 27 | 34 | 36 |
| abscisic acid metabolic process                             | 26 | 33 | -  |
| apocarotenoid metabolic process                             | 26 | 33 | -  |
| regulation of ion transmembrane transporter activity        | -  | 33 | -  |
| sesquiterpenoid biosynthetic process                        | -  | 32 | -  |
| nucleotide-excision repair                                  | -  | 32 | -  |
| apocarotenoid biosynthetic process                          | -  | 32 | -  |
| divalent inorganic cation homeostasis                       | 27 | 32 | 38 |
| regulation of transcription from RNA polymerase II promoter | 28 | 32 | -  |
| gibberellin metabolic process                               | -  | 31 | -  |
| purine nucleoside monophosphate biosynthetic process        | -  | 31 | -  |
| purine ribonucleoside monophosphate metabolic process       | -  | 31 | -  |
| negative regulation of phosphate metabolic process          | -  | 31 | -  |
| polar nucleus fusion                                        | -  | 30 | -  |

|                                                           |    |    |   |
|-----------------------------------------------------------|----|----|---|
| heterochromatin organization                              | -  | 30 | - |
| starch catabolic process                                  | 28 | 29 | - |
| DNA geometric change                                      | -  | 28 | - |
| positive regulation of translation                        | -  | 28 | - |
| pollen exine formation                                    | 30 | 28 | - |
| halogenated hydrocarbon catabolic process                 | -  | 28 | - |
| diterpenoid biosynthetic process                          | -  | 28 | - |
| malate metabolic process                                  | -  | 27 | - |
| organic phosphonate transport                             | -  | 27 | - |
| organophosphate ester transport                           | -  | 27 | - |
| DNA duplex unwinding                                      | -  | 26 | - |
| RNA polyadenylation                                       | -  | 26 | - |
| negative regulation of kinase activity                    | -  | 26 | - |
| negative regulation of protein kinase activity            | -  | 26 | - |
| chondroitin sulfate proteoglycan biosynthetic process     | -  | 26 | - |
| chloroplast RNA processing                                | -  | 25 | - |
| RNA-dependent DNA replication                             | -  | 25 | - |
| mRNA 3'-end processing                                    | -  | 25 | - |
| protein import into nucleus, docking                      | -  | 25 | - |
| triterpenoid biosynthetic process                         | -  | 25 | - |
| pyrimidine nucleoside monophosphate biosynthetic process  | -  | 25 | - |
| triterpenoid metabolic process                            | -  | 25 | - |
| glycosaminoglycan catabolic process                       | -  | 25 | - |
| iron ion homeostasis                                      | -  | 24 | - |
| base-excision repair                                      | -  | 24 | - |
| intracellular protein transmembrane transport             | -  | 24 | - |
| peptidyl-tyrosine dephosphorylation                       | -  | 24 | - |
| basipetal auxin transport                                 | -  | 24 | - |
| positive regulation of GTPase activity                    | -  | 24 | - |
| protein deacetylation                                     | -  | 23 | - |
| translational termination                                 | -  | 23 | - |
| pentacyclic triterpenoid metabolic process                | -  | 22 | - |
| pentacyclic triterpenoid biosynthetic process             | -  | 22 | - |
| pyrimidine ribonucleoside monophosphate metabolic process | -  | 22 | - |
| purine ribonucleoside biosynthetic process                | -  | 22 | - |
| monovalent inorganic cation homeostasis                   | -  | 21 | - |
| chloride transport                                        | -  | 21 | - |
| mismatch repair                                           | 32 | 21 | - |

\* A dash mark indicates that no unigene is found in that subcategory.
