# Supplementary material for: De Novo Transcriptome Sequence Assembly from Coconut Leaves and Seeds with a Focus on Factors Involved in RNA-Directed DNA Methylation
Source: PubMed Central journal article supplement (PMC4232540; doi:10.1534/g3.114.013409), 2014-09-04
Supplement: supp_g3.114.013409_TableS8.pdf [file supp_g3.114.013409_TableS8.pdf]

**Table S8 List of complete GO terms for biological process at level 8**

| Pathway                                                 | embryo | endosperm | leaf |
|---------------------------------------------------------|--------|-----------|------|
| Alanine, aspartate and glutamate metabolism             | 70     | 92        | 93   |
| alpha-Linolenic acid metabolism                         | 43     | 55        | 73   |
| Amino sugar and nucleotide sugar metabolism             | 116    | 193       | 158  |
| Aminoacyl-tRNA biosynthesis                             | 76     | 102       | 102  |
| Aminobenzoate degradation                               | 53     | 72        | 82   |
| Anthocyanin biosynthesis                                | 5      | 2         | 9    |
| Arachidonic acid metabolism                             | 33     | 41        | 50   |
| Arginine and proline metabolism                         | 113    | 133       | 122  |
| Ascorbate and aldarate metabolism                       | 48     | 66        | 57   |
| Atrazine degradation                                    | 5      | 4         | 4    |
| Benzoate degradation                                    | 11     | 30        | 23   |
| beta-Alanine metabolism                                 | 51     | 68        | 60   |
| beta-Lactam resistance                                  | 1      | 3         | 1    |
| Betalain biosynthesis                                   | 2      | 2         | 2    |
| Biosynthesis of ansamycins                              | 5      | 9         | 5    |
| Biosynthesis of siderophore group nonribosomal peptides | 0      | 3         | 3    |
| Biosynthesis of terpenoids and steroids                 | 1      | 0         | 1    |
| Biosynthesis of unsaturated fatty acids                 | 35     | 59        | 48   |
| Biosynthesis of vancomycin group antibiotics            | 3      | 7         | 6    |
| Biotin metabolism                                       | 18     | 28        | 28   |
| Butanoate metabolism                                    | 36     | 53        | 54   |
| Butirosin and neomycin biosynthesis                     | 5      | 12        | 5    |
| C5-Branched dibasic acid metabolism                     | 13     | 19        | 20   |
| Caffeine metabolism                                     | 9      | 12        | 27   |
| Caprolactam degradation                                 | 13     | 22        | 15   |
| Carbon fixation in photosynthetic organisms             | 93     | 140       | 142  |
| Carbon fixation pathways in prokaryotes                 | 65     | 104       | 102  |
| Carotenoid biosynthesis                                 | 12     | 11        | 13   |
| Chloroalkane and chloroalkene degradation               | 33     | 29        | 23   |
| Chlorocyclohexane and chlorobenzene degradation         | 6      | 9         | 8    |
| Citrate cycle (TCA cycle)                               | 71     | 105       | 116  |
| Cutin, suberine and wax biosynthesis                    | 6      | 4         | 8    |
| Cyanoamino acid metabolism                              | 27     | 37        | 52   |
| Cysteine and methionine metabolism                      | 97     | 112       | 112  |
| D-Alanine metabolism                                    | 6      | 4         | 4    |
| D-Arginine and D-ornithine metabolism                   | 3      | 2         | 3    |

|                                                                       |     |     |     |
|-----------------------------------------------------------------------|-----|-----|-----|
| D-Glutamine and D-glutamate metabolism                                | 5   | 8   | 4   |
| Diterpenoid biosynthesis                                              | 9   | 5   | 3   |
| Drug metabolism - cytochrome P450                                     | 39  | 36  | 46  |
| Drug metabolism - other enzymes                                       | 72  | 92  | 91  |
| Ether lipid metabolism                                                | 34  | 42  | 36  |
| Ethylbenzene degradation                                              | 3   | 6   | 5   |
| Fatty acid biosynthesis                                               | 37  | 68  | 53  |
| Fatty acid elongation                                                 | 17  | 35  | 25  |
| Fatty acid metabolism                                                 | 70  | 94  | 93  |
| Flavone and flavonol biosynthesis                                     | 5   | 5   | 13  |
| Flavonoid biosynthesis                                                | 31  | 32  | 71  |
| Fluorobenzoate degradation                                            | 4   | 8   | 7   |
| Folate biosynthesis                                                   | 12  | 14  | 14  |
| Fructose and mannose metabolism                                       | 65  | 103 | 99  |
| Galactose metabolism                                                  | 89  | 108 | 111 |
| Geraniol degradation                                                  | 18  | 30  | 23  |
| Glucosinolate biosynthesis                                            | 4   | 3   | 5   |
| Glutathione metabolism                                                | 92  | 95  | 114 |
| Glycerolipid metabolism                                               | 130 | 132 | 130 |
| Glycerophospholipid metabolism                                        | 100 | 136 | 110 |
| Glycine, serine and threonine metabolism                              | 90  | 124 | 126 |
| Glycolysis Gluconeogenesis                                            | 155 | 245 | 205 |
| Glycosaminoglycan biosynthesis - chondroitin sulfate dermatan sulfate | 22  | 26  | 22  |
| Glycosaminoglycan biosynthesis - heparan sulfate heparin              | 33  | 39  | 32  |
| Glycosaminoglycan biosynthesis - keratan sulfate                      | 2   | 1   | 0   |
| Glycosaminoglycan degradation                                         | 23  | 25  | 19  |
| Glycosphingolipid biosynthesis - ganglio series                       | 22  | 24  | 17  |
| Glycosphingolipid biosynthesis - globo series                         | 17  | 18  | 14  |
| Glycosphingolipid biosynthesis - lacto and neolacto series            | 4   | 7   | 2   |
| Glycosylphosphatidylinositol(GPI)-anchor biosynthesis                 | 3   | 2   | 2   |
| Glyoxylate and dicarboxylate metabolism                               | 89  | 129 | 154 |
| Histidine metabolism                                                  | 28  | 31  | 27  |
| Indole alkaloid biosynthesis                                          | 8   | 10  | 15  |
| Inositol phosphate metabolism                                         | 86  | 97  | 71  |
| Insect hormone biosynthesis                                           | 0   | 0   | 1   |
| Isoflavonoid biosynthesis                                             | 0   | 2   | 5   |
| Isoquinoline alkaloid biosynthesis                                    | 24  | 38  | 31  |
| Limonene and pinene degradation                                       | 24  | 36  | 26  |

|                                                     |     |     |     |
|-----------------------------------------------------|-----|-----|-----|
| Linoleic acid metabolism                            | 19  | 24  | 54  |
| Lipoic acid metabolism                              | 8   | 12  | 9   |
| Lipopolysaccharide biosynthesis                     | 5   | 11  | 9   |
| Lysine biosynthesis                                 | 21  | 24  | 25  |
| Lysine degradation                                  | 58  | 88  | 61  |
| Metabolism of xenobiotics by cytochrome P450        | 37  | 38  | 49  |
| Methane metabolism                                  | 101 | 240 | 183 |
| Monoterpenoid biosynthesis                          | 1   | 5   | 6   |
| mTOR signaling pathway                              | 17  | 18  | 14  |
| Mucin type O-Glycan biosynthesis                    | 2   | 1   | 0   |
| Naphthalene degradation                             | 13  | 7   | 7   |
| N-Glycan biosynthesis                               | 29  | 35  | 27  |
| Nicotinate and nicotinamide metabolism              | 24  | 17  | 30  |
| Nitrogen metabolism                                 | 112 | 190 | 183 |
| Novobiocin biosynthesis                             | 19  | 25  | 17  |
| One carbon pool by folate                           | 32  | 36  | 42  |
| Other glycan degradation                            | 52  | 45  | 40  |
| Other types of O-glycan biosynthesis                | 7   | 7   | 10  |
| Oxidative phosphorylation                           | 94  | 163 | 149 |
| Pantothenate and CoA biosynthesis                   | 35  | 39  | 41  |
| Penicillin and cephalosporin biosynthesis           | 2   | 4   | 3   |
| Pentose and glucuronate interconversions            | 64  | 101 | 62  |
| Pentose phosphate pathway                           | 74  | 114 | 130 |
| Peptidoglycan biosynthesis                          | 10  | 31  | 5   |
| Phenylalanine metabolism                            | 100 | 139 | 114 |
| Phenylalanine, tyrosine and tryptophan biosynthesis | 69  | 84  | 77  |
| Phenylpropanoid biosynthesis                        | 53  | 77  | 84  |
| Phosphatidylinositol signaling system               | 109 | 107 | 74  |
| Phosphonate and phosphinate metabolism              | 2   | 9   | 5   |
| Photosynthesis                                      | 3   | 5   | 3   |
| Polyketide sugar unit biosynthesis                  | 7   | 11  | 10  |
| Porphyrin and chlorophyll metabolism                | 65  | 73  | 87  |
| Primary bile acid biosynthesis                      | 5   | 13  | 5   |
| Propanoate metabolism                               | 55  | 83  | 75  |
| Purine metabolism                                   | 351 | 415 | 412 |
| Pyrimidine metabolism                               | 148 | 197 | 172 |
| Pyruvate metabolism                                 | 107 | 162 | 170 |
| Retinol metabolism                                  | 22  | 22  | 37  |

|                                                        |             |             |             |
|--------------------------------------------------------|-------------|-------------|-------------|
| Riboflavin metabolism                                  | 31          | 44          | 45          |
| Selenocompound metabolism                              | 36          | 38          | 37          |
| Sesquiterpenoid and triterpenoid biosynthesis          | 1           | 0           | 1           |
| Sphingolipid metabolism                                | 72          | 70          | 63          |
| Starch and sucrose metabolism                          | 274         | 409         | 272         |
| Steroid biosynthesis                                   | 19          | 37          | 34          |
| Steroid degradation                                    | 7           | 6           | 8           |
| Steroid hormone biosynthesis                           | 11          | 32          | 40          |
| Stilbenoid, diarylheptanoid and gingerol biosynthesis  | 4           | 6           | 10          |
| Streptomycin biosynthesis                              | 18          | 47          | 38          |
| Styrene degradation                                    | 17          | 18          | 19          |
| Sulfur metabolism                                      | 50          | 64          | 68          |
| Synthesis and degradation of ketone bodies             | 8           | 10          | 14          |
| T cell receptor signaling pathway                      | 120         | 137         | 118         |
| Taurine and hypotaurine metabolism                     | 7           | 9           | 8           |
| Terpenoid backbone biosynthesis                        | 33          | 52          | 57          |
| Tetracycline biosynthesis                              | 9           | 14          | 12          |
| Thiamine metabolism                                    | 79          | 78          | 81          |
| Toluene degradation                                    | 11          | 19          | 17          |
| Tropane, piperidine and pyridine alkaloid biosynthesis | 28          | 42          | 29          |
| Tryptophan metabolism                                  | 71          | 88          | 87          |
| Tyrosine metabolism                                    | 53          | 68          | 52          |
| Ubiquinone and other terpenoid-quinone biosynthesis    | 23          | 31          | 31          |
| Valine, leucine and isoleucine biosynthesis            | 19          | 25          | 22          |
| Valine, leucine and isoleucine degradation             | 66          | 87          | 87          |
| Various types of N-glycan biosynthesis                 | 22          | 26          | 20          |
| Vitamin B6 metabolism                                  | 8           | 21          | 17          |
| Xylene degradation                                     | 3           | 1           | 2           |
| Zeatin biosynthesis                                    | 4           | 6           | 8           |
| <b>Total</b>                                           | <b>5686</b> | <b>7707</b> | <b>7231</b> |
